# Supplementary material for: Rotors tailoring molecular stacking for constructing multi-stimuli-responsive luminescent materials
Source: Royal Society of Chemistry journal article supplement (doi:10.1039/d2cc06847h), 2023-01-01
Supplement: d2cc06847h1.pdf [file d2cc06847h1.pdf]

**Electronic Supplementary information for**

**Rotors tailoring molecular stacking for constructing multi-stimuli-responsive luminescent materials**

**Zheng-Fei Liu, Lan Zeng, Li-Ya Niu and Qing-Zheng Yang\***

Key Laboratory of Radiopharmaceuticals, Ministry of Education, College of Chemistry, Beijing Normal University, Beijing 100875, P. R. China.

Email: qzyang@bnu.edu.cn

## Table of Content

|                                                                 |           |
|-----------------------------------------------------------------|-----------|
| <b>1. Materials</b> .....                                       | <b>3</b>  |
| <b>2. Characterization methods</b> .....                        | <b>3</b>  |
| 2.1 Nuclear magnetic resonance (NMR).....                       | 3         |
| 2.2 Electrospray ionization mass spectroscopy (ESI-MS).....     | 3         |
| 2.3 Single crystal X-ray diffraction (SC-XRD) .....             | 3         |
| 2.4 UV-Vis absorption and photoluminescence spectroscopy.....   | 4         |
| 2.5 Powder X-ray diffraction (PXRD).....                        | 4         |
| 2.6 Theoretical calculations .....                              | 4         |
| <b>3. Synthesis</b> .....                                       | <b>5</b>  |
| <b>4. The absorption and emission spectra in solution</b> ..... | <b>7</b>  |
| <b>5. X-ray crystallography</b> .....                           | <b>8</b>  |
| <b>6. Theoretical calculations</b> .....                        | <b>18</b> |
| <b>7. The analysis of crystal structures</b> .....              | <b>20</b> |
| <b>8. Emission spectra in solid</b> .....                       | <b>22</b> |
| <b>8. Powder X-ray diffraction</b> .....                        | <b>24</b> |
| <b>10. NMR spectra</b> .....                                    | <b>25</b> |
| <b>11. Mass spectra</b> .....                                   | <b>26</b> |
| <b>14. References</b> .....                                     | <b>27</b> |

## 1. Materials

General reagents and solvents were purchased from commercial suppliers and used without any purification, unless otherwise noted, 2-acetyl pyrrole, iodoethane, 2-iodothiophene, methyl 1*H*-pyrrole-2-carboxylate, boron trifluoride diethyl etherate, triethylamine, cesium carbonate, potassium hydroxide, copper powder and sodium hydride were purchased from Sun Chemical Technology (Shanghai) Co. Ltd. All solvents were purchased from Beijing Chemical Reagent Plant.

## 2. Characterization methods

### 2.1 Nuclear magnetic resonance (NMR)

Nuclear magnetic resonance (NMR) spectra were recorded on JEOL-600 spectrometer at room temperature. Chemical shift values ( $\delta$ ) and coupling constants ( $J$ ) are reported in ppm and Hertz (Hz), respectively. The signals multiplicity for  $^1\text{H}$  NMR spectra are described using the following abbreviations: “s” (singlet), “d” (doublet), “t” (triplet), “dt” (doublet of triplets), “dd” (doublet of doublets) and “m” (multiplet).

### 2.2 Electrospray ionization mass spectroscopy (ESI-MS)

High-resolution mass spectrometry experiments were performed on Bruker Solarix XR Fourier Transform Ion Cyclotron Resonance Mass Spectrometer.

### 2.3 Single crystal X-ray diffraction (SC-XRD)

Single crystal X-ray diffraction (SC-XRD) data were collected on a SuperNova Rigaku Oxford Diffraction diffractometer with Cu-K $\alpha$  radiation,  $\lambda = 1.54184 \text{ \AA}$ . NoSpherA2, an implementation of NON-SPHERICAL Atom-form-factors in Olex2 was used for refinement of the crystal structures.<sup>1</sup> The crystal structure data are summarized in Table S1-S2.

## 2.4 UV-Vis absorption and photoluminescence spectroscopy

UV-visible absorption and emission spectra for the solution samples were recorded with Hitachi UV-3900 and F-4600 spectrometer, respectively. Steady fluorescence spectra of solid samples were determined by Edinburgh instruments FLS-980. The time resolved fluorescence spectra were recorded by time-correlated single photon counting Edinburgh Instruments FLS-980. Fluorescence quantum yields were determined on HAMAMATSU C11347.

## 2.5 Powder X-ray diffraction (PXRD)

PXRD patterns were measured by Shimadzu XRD-7000 with Cu-K $\alpha$  radiation ( $\lambda = 1.54050 \text{ \AA}$ ) operated in the  $2\theta$  range from 5 to 40°.

## 2.6 Theoretical calculations

All calculations were performed with the Gaussian09 program.<sup>2</sup> Single-point calculations are done with the simplified TD-DFT based on electronic wavefunctions calculated at the B3LYP level. DFT calculated minimum-energy isomerization pathway along the rotation of the N-C bond between the pyrrole and thiophene ring, using 1° per step. The 6-311G basis sets are used in all calculations.

### 3. Synthesis

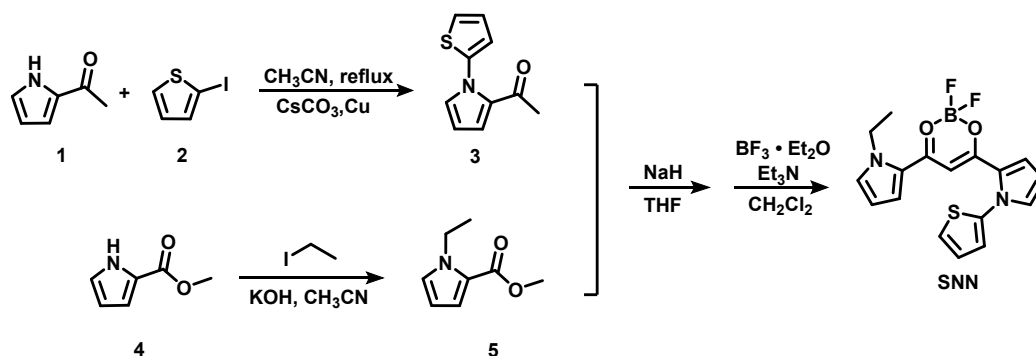

**Figure S1.** Synthetic route of SNN.

#### Synthesis of 1-(1-(thiophen-2-yl))-1H-pyrrol-2-yl)ethan-1-one (compound 3):

The synthesis of compound 3 refer to the reported literature.<sup>3</sup>

**Synthesis of methyl 1-ethyl-1H-pyrrole-2-carboxylate (compound 5):** To a solution of methyl 1H-pyrrole-2-carboxylate (500.0 mg, 4.0 mmol) in 50.0 mL acetonitrile was added potassium hydroxide (771.0 mg, 13.7 mmol) and iodoethane (1.3 g, 8.3 mmol). The reaction mixture was stirred at room temperature for 2 hours. The resulting mixture was extracted with dichloromethane (3× 30.0 mL) and the organic phase was collected, dried over anhydrous sodium sulfate and concentrated in vacuum. The crude product was purified by column chromatography (petroleum ether/dichloromethane = 3:1) to yield compound 5 (520.0 mg, 85%) as a light-yellow oil. <sup>1</sup>H NMR (600 MHz, CDCl<sub>3</sub>) δ 7.05 – 6.91 (m, 1H), 6.85 (s, 1H), 6.18 – 5.98 (m, 1H), 4.35 (q, *J* = 7.2 Hz, 2H), 3.80 (s, 2H), 1.38 (t, *J* = 7.2 Hz, 2H).

#### Synthesis of SNN:

**Step 1:** Compound 3 (300.0 mg, 1.6 mmol) and THF (5.0 mL) were added to a 25.0 mL round-bottom flask and purged with nitrogen for 10 mins. Then NaH (57-63% oil dispersion, 188.0 mg, 4.7 mmol) was added to the resultant solution, and stirred under nitrogen at 60 °C for 30 min, followed by slow addition of compound 5 (350.0 mg, 1.6 mmol). The resulting mixture was refluxed under nitrogen for 20 hours. The reaction mixture was allowed to cool to room temperature before being quenched carefully with water (10.0 mL) in ice bath. The pH was adjusted to 3 with HCl (aq). The aqueous

suspension was extracted with dichloromethane (3× 30.0 mL). The organic phase was dried over anhydrous sodium sulfate, and concentrated under reduced pressure to obtain the crude product as a brown oil. The crude product was directly used for next step without further purification.

**Step 2:** To a solution of the crude product in 10.0 mL dichloromethane was added 1.0 mL Et<sub>3</sub>N. After stirring for 10 min at room temperature, 1.0 mL BF<sub>3</sub>·Et<sub>2</sub>O was added. The solution was stirred for another 2 hours in the dark. Water was added to the solution, and the organic layers was collected, washed with water, dried over anhydrous sodium sulfate, and concentrated under reduced pressure. The crude product was purified by column chromatography (petroleum ether/dichloromethane = 1:1) to yield SNN (265.0 mg, 46%) as a yellow solid. <sup>1</sup>H NMR (600 MHz, CDCl<sub>3</sub>, 298 K) δ 7.40 (d, *J* = 5.5 Hz, 1H), 7.38 (dd, *J* = 4.0, 1.4 Hz, 1H), 7.26 (s, 1H), 7.13 (q, *J* = 3.1, 2.5 Hz, 3H), 7.11 (dd, *J* = 5.3, 3.9 Hz, 1H), 7.03 (s, 1H), 6.64 – 6.58 (m, 1H), 6.45 – 6.41 (m, 1H), 6.19 (dd, *J* = 4.1, 2.5 Hz, 1H), 5.88 (s, 1H), 4.37 (q, *J* = 7.2 Hz, 2H), 1.56 (s, 2H), 1.42 (t, *J* = 7.2 Hz, 3H). <sup>13</sup>C NMR (151 MHz, CDCl<sub>3</sub>, 298 K) δ 172.28, 168.41, 140.89, 134.44, 133.52, 129.75, 126.01, 125.90, 125.38, 122.29, 121.54, 111.50, 111.02, 92.52, 46.27, 16.94, 0.06. HR-MS (ESI) C<sub>17</sub>H<sub>16</sub>BF<sub>2</sub>N<sub>2</sub>O<sub>2</sub>S<sup>+</sup> [M+H]<sup>+</sup>, Calculated: 361.0991; Found: 361.0990.

**Preparation of PMMA Films doped with different concentration of SNN:** The SNN and PMMA with different mass ratios were dissolved in 1-2 mL dichloromethane. The clear solutions were deposited on optical grade quartz plates of 1x1 cm by drop casting, and allowed to dry 1 hour.

#### 4. The absorption and emission spectra in solution

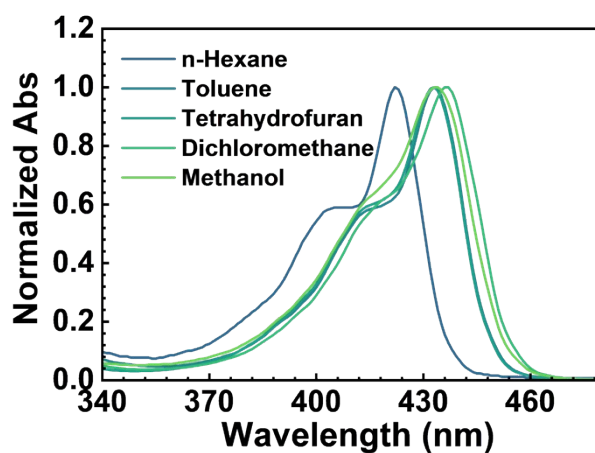

Figure S2. The normalized absorption spectra of SNN in different solvents ( $1 \times 10^{-5}$  M).

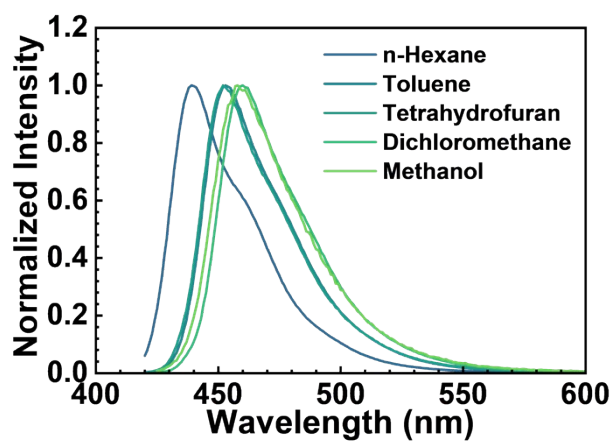

Figure S3. The normalized fluorescence spectra of SNN in different solvents ( $1 \times 10^{-5}$  M).

## 5. X-ray crystallography

The **G** and **O** of SNN suitable for X-ray crystallography were obtained by slow evaporation of its solution in mixed solvents of dichloromethane and *n*-hexane (v/v = 1:1). CCDC deposition numbers of **G** and **O** are 2224763 and 2224926 respectively.

**Table S1.** Crystal data and structure refinement for **G**.

|                                   |                                                                                                                                                 |
|-----------------------------------|-------------------------------------------------------------------------------------------------------------------------------------------------|
| Identification code               | <b>G</b>                                                                                                                                        |
| Empirical formula                 | C <sub>17</sub> H <sub>15</sub> BF <sub>2</sub> N <sub>2</sub> O <sub>2</sub> S                                                                 |
| Formula weight                    | 360.18                                                                                                                                          |
| Temperature                       | 100.01(10) K                                                                                                                                    |
| Wavelength                        | 1.54184 Å                                                                                                                                       |
| Crystal system, space group       | triclinic, <i>P</i> $\bar{1}$                                                                                                                   |
| Unit cell dimensions              | $a = 7.3035(2)$ Å, $\alpha = 76.416(2)^\circ$<br>$b = 9.1624(3)$ Å, $\beta = 89.655(2)^\circ$<br>$c = 12.5664(3)$ Å, $\gamma = 79.328(2)^\circ$ |
| Volume                            | 802.63(4) Å <sup>3</sup>                                                                                                                        |
| Z, Calculated density             | 2, 1.490 g/cm <sup>3</sup>                                                                                                                      |
| Absorption coefficient            | 2.118 mm <sup>-1</sup>                                                                                                                          |
| F (000)                           | 372.0                                                                                                                                           |
| Crystal size                      | 0.2 × 0.2 × 0.1 mm <sup>3</sup>                                                                                                                 |
| 2θ range for data collection      | 7.24 to 152.64°                                                                                                                                 |
| Index ranges                      | -9 ≤ h ≤ 8, -11 ≤ k ≤ 11, -15 ≤ l ≤ 14                                                                                                          |
| Reflections collected             | 8646                                                                                                                                            |
| Independent reflections           | 3028 [R <sub>int</sub> = 0.0257, R <sub>sigma</sub> = 0.0259]                                                                                   |
| Data/restraints/parameters        | 3208/0/362                                                                                                                                      |
| Goodness-of-fit on F <sup>2</sup> | 1.046                                                                                                                                           |
| Final R indexes [I ≥ 2σ (I)]      | R <sub>1</sub> = 0.0327, wR <sub>2</sub> = 0.0858                                                                                               |
| Final R indexes [all data]        | R <sub>1</sub> = 0.0336, wR <sub>2</sub> = 0.0865                                                                                               |
| Largest diff. peak/hole / e       | 0.30/-0.24 Å <sup>-3</sup>                                                                                                                      |



**Table S2.** Crystal data and structure refinement for **O**.

---

|                                               |                                                                                                                                                    |
|-----------------------------------------------|----------------------------------------------------------------------------------------------------------------------------------------------------|
| Identification code                           | <b>O</b>                                                                                                                                           |
| Empirical formula                             | C <sub>17</sub> H <sub>15</sub> BF <sub>2</sub> N <sub>2</sub> O <sub>2</sub> S                                                                    |
| Formula weight                                | 360.208                                                                                                                                            |
| Temperature                                   | 100.15 K                                                                                                                                           |
| Wavelength                                    | 1.54184 Å                                                                                                                                          |
| Crystal system, space group                   | triclinic, <i>P</i> <sup>1</sup>                                                                                                                   |
| Unit cell dimensions                          | <i>a</i> = 8.4059(2) Å, <i>α</i> = 109.969(2)°<br><i>b</i> = 9.7970(2) Å, <i>β</i> = 99.326(2)°<br><i>c</i> = 11.4192(2) Å, <i>γ</i> = 104.781(2)° |
| Volume                                        | 821.86(4) Å <sup>3</sup>                                                                                                                           |
| Z, Calculated density                         | 2, 1.456 g/cm <sup>3</sup>                                                                                                                         |
| Absorption coefficient                        | 2.069 mm <sup>-1</sup>                                                                                                                             |
| F (000)                                       | 374.0                                                                                                                                              |
| Crystal size                                  | 0.2 × 0.2 × 0.2 mm <sup>3</sup>                                                                                                                    |
| 2θ range for data collection                  | 8.56 to 153.08°                                                                                                                                    |
| Index ranges                                  | -10 ≤ <i>h</i> ≤ 10, -12 ≤ <i>k</i> ≤ 12, -13 ≤ <i>l</i> ≤ 14                                                                                      |
| Reflections collected                         | 8864                                                                                                                                               |
| Independent reflections                       | 3278 [ <i>R</i> <sub>int</sub> = 0.0254, <i>R</i> <sub>sigma</sub> = 0.0237]                                                                       |
| Data/restraints/parameters                    | 3278/187/348                                                                                                                                       |
| Goodness-of-fit on F <sup>2</sup>             | 1.092                                                                                                                                              |
| Final R indexes [ <i>I</i> ≥ 2σ ( <i>I</i> )] | <i>R</i> <sub>1</sub> = 0.0263, <i>wR</i> <sub>2</sub> = 0.0702                                                                                    |
| Final R indexes [all data]                    | <i>R</i> <sub>1</sub> = 0.0273, <i>wR</i> <sub>2</sub> = 0.0708                                                                                    |
| Largest diff. peak/hole / e                   | 0.24/-0.24                                                                                                                                         |

---

**Table S3.** Anisotropic Displacement Parameters ( $\text{\AA}^2 \times 10^3$ ) for **G**. The Anisotropic displacement factor exponent takes the form:  $-2\pi^2[h^2a^2U_{11}+2hka^*b^*U_{12}+\dots]$ .

| Atom | $U_{11}$  | $U_{22}$  | $U_{33}$ | $U_{12}$  | $U_{13}$ | $U_{23}$  |
|------|-----------|-----------|----------|-----------|----------|-----------|
| S16  | 17.92(19) | 13.37(18) | 23.4(2)  | -1.56(13) | 2.33(13) | -2.05(12) |
| F25  | 15.3(4)   | 31.6(5)   | 18.5(4)  | -6.0(3)   | 2.1(3)   | -5.2(3)   |
| F24  | 34.8(5)   | 16.4(4)   | 20.0(4)  | -4.3(3)   | 1.4(3)   | -0.5(3)   |
| O2   | 12.6(4)   | 23.5(5)   | 14.7(5)  | -5.1(4)   | 0.0(3)   | 0.1(4)    |
| O4   | 14.2(4)   | 22.6(5)   | 14.2(4)  | -4.2(4)   | 0.9(3)   | 0.8(4)    |
| N11  | 14.2(5)   | 13.1(5)   | 12.8(5)  | -3.4(4)   | 0.6(4)   | -1.3(4)   |
| N21  | 19.5(6)   | 20.8(6)   | 13.0(5)  | -2.6(4)   | -0.5(4)  | -3.6(4)   |
| C1   | 13.5(6)   | 10.8(6)   | 16.8(6)  | -4.4(5)   | 1.8(5)   | -2.5(4)   |
| C10  | 20.1(6)   | 15.7(6)   | 12.3(6)  | -3.8(5)   | 2.7(5)   | -4.6(5)   |
| C20  | 17.7(6)   | 16.1(6)   | 14.2(6)  | -3.2(5)   | 1.0(5)   | -3.4(5)   |
| C12  | 16.6(6)   | 13.8(6)   | 12.4(6)  | -4.1(5)   | 1.7(5)   | -0.9(5)   |
| C6   | 14.2(6)   | 16.2(6)   | 14.6(6)  | -3.1(5)   | 0.6(5)   | -1.1(5)   |
| C7   | 14.4(6)   | 12.9(6)   | 14.8(6)  | -4.4(5)   | 0.8(5)   | -2.5(5)   |
| C9   | 21.9(7)   | 14.9(6)   | 12.7(6)  | -2.6(5)   | -0.7(5)  | -3.4(5)   |
| C5   | 15.3(6)   | 10.9(6)   | 17.0(6)  | -3.6(5)   | 0.6(5)   | -2.5(5)   |
| C8   | 16.1(6)   | 13.9(6)   | 16.4(6)  | -4.2(5)   | -1.0(5)  | -1.9(5)   |
| C13  | 17.6(6)   | 17.4(6)   | 17.3(6)  | -6.5(5)   | -0.3(5)  | -2.1(5)   |
| C22  | 20.6(7)   | 30.7(8)   | 13.5(6)  | -6.4(5)   | 4.2(5)   | -6.0(6)   |
| C19  | 18.4(6)   | 20.3(7)   | 17.9(7)  | -2.6(5)   | -1.1(5)  | -0.7(5)   |
| C14  | 16.7(6)   | 25.0(7)   | 19.6(7)  | -6.6(6)   | -1.9(5)  | 2.5(5)    |
| C15  | 21.2(7)   | 19.5(7)   | 19.2(7)  | -1.9(5)   | 2.2(5)   | 3.7(5)    |
| C17  | 26.3(7)   | 26.0(7)   | 13.8(6)  | -1.4(5)   | -4.9(5)  | -5.7(6)   |
| C18  | 22.0(7)   | 25.2(7)   | 21.4(7)  | -1.9(6)   | -6.6(6)  | -1.0(6)   |
| C23  | 24.2(7)   | 28.1(8)   | 22.6(7)  | -12.2(6)  | 3.7(6)   | -1.8(6)   |
| B3   | 14.8(7)   | 16.8(7)   | 13.6(7)  | -3.7(5)   | 0.2(5)   | 0.1(5)    |

**Table S4.** Anisotropic Displacement Parameters ( $\text{\AA}^2 \times 10^3$ ) for **O**. The Anisotropic displacement factor exponent takes the form:  $-2\pi^2[h^2a^2U_{11}+2hka^*b^*U_{12}+\dots]$ .

| Atom | $U_{11}$ | $U_{22}$ | $U_{33}$ | $U_{12}$ | $U_{13}$ | $U_{23}$  |
|------|----------|----------|----------|----------|----------|-----------|
| S1   | 21.4(3)  | 36.3(2)  | 24.9(2)  | 10.2(2)  | 6.5(2)   | 10.20(16) |
| F002 | 60.1(4)  | 28.9(3)  | 31.2(3)  | 22.0(3)  | 17.5(3)  | 17.1(3)   |
| F003 | 43.6(4)  | 27.0(3)  | 30.6(3)  | 0.6(3)   | 19.1(3)  | 6.0(2)    |
| O004 | 36.1(4)  | 20.2(3)  | 23.0(3)  | 10.9(3)  | 14.4(3)  | 10.6(3)   |
| O005 | 46.0(4)  | 25.6(3)  | 30.3(4)  | 17.8(3)  | 22.8(3)  | 15.4(3)   |
| C10  | 25.4(11) | 28.8(8)  | 27.5(7)  | 9.1(5)   | 8.7(4)   | 11.8(4)   |
| N007 | 22.8(4)  | 18.7(4)  | 22.7(4)  | 6.5(3)   | 7.0(3)   | 6.6(3)    |
| C008 | 22.6(4)  | 17.2(4)  | 19.7(4)  | 4.8(3)   | 6.7(3)   | 7.3(3)    |
| C009 | 23.0(4)  | 18.1(4)  | 23.2(4)  | 5.9(3)   | 7.3(3)   | 8.5(3)    |
| N8   | 21.4(11) | 24.7(9)  | 20.1(9)  | 2.9(7)   | 7.4(8)   | 2.6(7)    |
| C00B | 24.4(4)  | 20.5(4)  | 21.1(4)  | 5.4(3)   | 10.2(3)  | 8.2(3)    |
| C00C | 24.4(4)  | 25.6(5)  | 20.6(4)  | 6.2(4)   | 9.7(3)   | 7.8(4)    |
| C00D | 28.9(5)  | 21.1(4)  | 20.1(4)  | 7.7(4)   | 8.3(4)   | 9.0(4)    |
| H00D | 80(12)   | 31(8)    | 46(9)    | 27(8)    | 24(8)    | 19(7)     |
| C00E | 28.1(5)  | 19.1(4)  | 32.2(5)  | 9.0(4)   | 9.1(4)   | 6.6(4)    |
| H00E | 69(12)   | 39(9)    | 47(9)    | 19(8)    | 27(8)    | 16(8)     |
| C00F | 31.2(5)  | 22.1(5)  | 29.6(5)  | 8.8(4)   | 8.8(4)   | 13.7(4)   |
| H00F | 71(11)   | 42(9)    | 28(8)    | 30(8)    | 20(7)    | 19(7)     |
| C00G | 34.2(5)  | 21.2(5)  | 38.4(6)  | 11.1(4)  | 9.9(4)   | 14.3(4)   |
| H00G | 59(11)   | 42(9)    | 62(10)   | 25(8)    | 9(8)     | 31(8)     |
| C00H | 22.9(4)  | 21.9(4)  | 21.0(4)  | 7.6(3)   | 9.0(3)   | 6.6(3)    |
| C00I | 41.2(19) | 41(2)    | 24.7(14) | 14.9(15) | 16.2(13) | 16.5(15)  |
| C00J | 31(2)    | 46(2)    | 17.1(15) | 8.2(12)  | 9.2(12)  | 8.2(10)   |
| C00K | 41.2(18) | 43(2)    | 25.6(12) | 22.7(17) | 12.3(13) | 14.5(13)  |
| C00L | 26(2)    | 35.2(13) | 18.4(11) | 5.6(12)  | 6.8(12)  | 9.3(9)    |
| C00M | 19(2)    | 36.0(15) | 21.8(13) | 2.3(11)  | 5.7(12)  | 1.7(10)   |
| B1   | 36.9(6)  | 19.5(5)  | 25.6(5)  | 9.3(4)   | 15.7(4)  | 11.1(4)   |
| C00O | 27.2(8)  | 24.6(8)  | 31.8(8)  | 6.9(6)   | 12.8(6)  | 7.6(6)    |
| C00P | 40.4(10) | 23.2(9)  | 52.6(11) | 4.8(7)   | 22.7(8)  | 10.1(8)   |

|      |          |          |          |          |          |          |
|------|----------|----------|----------|----------|----------|----------|
| S1a  | 23.9(13) | 33.1(9)  | 28.9(8)  | 10.9(8)  | 10.3(7)  | 14.0(6)  |
| C10a | 12(4)    | 35(3)    | 30(3)    | 2(2)     | 3(2)     | 10.3(17) |
| C1   | 26(4)    | 35(6)    | 28(6)    | 10(3)    | 7(2)     | 10(3)    |
| C2   | 23(4)    | 23(4)    | 30(6)    | 11(2)    | 9(2)     | 8(3)     |
| N8a  | 22(2)    | 21.3(17) | 18.9(16) | 6.7(13)  | 5.1(13)  | 2.0(12)  |
| C3   | 36(6)    | 35(3)    | 22(3)    | 14(3)    | 11(2)    | 10.2(18) |
| C4   | 29(5)    | 24(2)    | 19(2)    | 7(2)     | 8(2)     | 9.3(15)  |
| C00n | 18(4)    | 27(3)    | 16(2)    | 7(2)     | 3.0(18)  | 0.8(15)  |
| C5   | 26.1(15) | 21.4(15) | 30.1(16) | 8.3(11)  | 8.0(11)  | 4.8(11)  |
| C00q | 29.4(17) | 45(2)    | 47(2)    | 13.7(14) | 12.4(13) | 25.0(15) |

---

**Table S5.** Bond Lengths for **G**.

| Atom | Atom | Length/Å   | Atom | Atom | Length/Å   |
|------|------|------------|------|------|------------|
| S16  | C12  | 1.7279(13) | C1   | C6   | 1.3816(18) |
| S16  | C15  | 1.7193(15) | C1   | C7   | 1.4442(18) |
| F25  | B3   | 1.3702(17) | C10  | C9   | 1.3748(19) |
| F24  | B3   | 1.3859(17) | C20  | C5   | 1.4296(18) |
| O2   | C1   | 1.3217(15) | C20  | C19  | 1.3985(19) |
| O2   | B3   | 1.4757(16) | C12  | C13  | 1.3534(19) |
| O4   | C5   | 1.3099(16) | C6   | C5   | 1.4017(18) |
| O4   | B3   | 1.4829(17) | C7   | C8   | 1.3878(18) |
| N11  | C10  | 1.3700(16) | C9   | C8   | 1.4046(18) |
| N11  | C12  | 1.4184(16) | C13  | C14  | 1.4253(19) |
| N11  | C7   | 1.3950(16) | C22  | C23  | 1.520(2)   |
| N21  | C20  | 1.3902(17) | C19  | C18  | 1.394(2)   |
| N21  | C22  | 1.4738(18) | C14  | C15  | 1.356(2)   |
| N21  | C17  | 1.3551(18) | C17  | C18  | 1.382(2)   |

**Table S6.** Bond Lengths for **O**.

| Atom | Atom | Length/Å   | Atom | Atom | Length/Å   |
|------|------|------------|------|------|------------|
| S1   | C00H | 1.7210(11) | C00B | C00D | 1.3929(13) |
| S1   | C00K | 1.711(5)   | C00C | C00L | 1.392(5)   |
| F002 | B1   | 1.3645(13) | C00C | N8a  | 1.430(4)   |
| F003 | B1   | 1.3878(13) | C00C | C4   | 1.399(9)   |
| O004 | C008 | 1.3050(11) | C00E | C00G | 1.3813(15) |
| O004 | B1   | 1.4773(12) | C00F | C00G | 1.4082(14) |
| O005 | C00B | 1.3068(11) | C00H | S1a  | 1.657(3)   |
| O005 | B1   | 1.4822(12) | C00H | C10a | 1.355(9)   |
| C10  | C00H | 1.381(3)   | C00I | C00K | 1.364(6)   |
| C10  | C00I | 1.415(6)   | C00J | C00L | 1.394(8)   |
| N007 | C009 | 1.3939(11) | C00J | C00M | 1.399(11)  |
| N007 | C00E | 1.3669(12) | C00O | C00P | 1.523(2)   |
| N007 | C00H | 1.4130(12) | S1a  | C2   | 1.71(2)    |
| C008 | C009 | 1.4387(12) | C10a | C1   | 1.46(2)    |
| C008 | C00D | 1.3933(12) | C1   | C2   | 1.38(3)    |
| C009 | C00F | 1.3937(13) | N8a  | C00n | 1.340(9)   |
| N8   | C00C | 1.376(3)   | N8a  | C5   | 1.473(6)   |
| N8   | C00M | 1.360(5)   | C3   | C4   | 1.416(15)  |
| N8   | C00O | 1.463(3)   | C3   | C00n | 1.368(17)  |
| C00B | C00C | 1.4348(12) | C5   | C00q | 1.513(5)   |

**Table S7.** Bond Angles for **G**.

| Atom | Atom | Atom | Angle/°    | Atom | Atom | Atom | Angle/°    |
|------|------|------|------------|------|------|------|------------|
| C15  | S16  | C12  | 90.82(7)   | C8   | C7   | N11  | 107.08(11) |
| C1   | O2   | B3   | 121.76(10) | C8   | C7   | C1   | 126.19(12) |
| C5   | O4   | B3   | 121.91(11) | C10  | C9   | C8   | 107.28(12) |
| C10  | N11  | C12  | 122.79(11) | O4   | C5   | C20  | 117.13(12) |
| C10  | N11  | C7   | 108.53(10) | O4   | C5   | C6   | 120.87(12) |
| C7   | N11  | C12  | 127.90(11) | C6   | C5   | C20  | 122.00(12) |
| C20  | N21  | C22  | 129.09(11) | C7   | C8   | C9   | 108.12(12) |
| C17  | N21  | C20  | 108.11(12) | C12  | C13  | C14  | 111.67(12) |
| C17  | N21  | C22  | 122.51(12) | N21  | C22  | C23  | 112.70(11) |
| O2   | C1   | C6   | 121.38(12) | C18  | C19  | C20  | 107.77(13) |
| O2   | C1   | C7   | 112.19(11) | C15  | C14  | C13  | 113.00(12) |
| C6   | C1   | C7   | 126.39(12) | C14  | C15  | S16  | 111.94(11) |
| N11  | C10  | C9   | 108.98(11) | N21  | C17  | C18  | 109.82(12) |
| N21  | C20  | C5   | 124.89(12) | C17  | C18  | C19  | 106.88(12) |
| N21  | C20  | C19  | 107.41(12) | F25  | B3   | F24  | 111.09(11) |
| C19  | C20  | C5   | 127.70(12) | F25  | B3   | O2   | 108.89(11) |
| N11  | C12  | S16  | 120.02(10) | F25  | B3   | O4   | 108.42(11) |
| C13  | C12  | S16  | 112.54(10) | F24  | B3   | O2   | 108.91(11) |
| C13  | C12  | N11  | 127.32(12) | F24  | B3   | O4   | 108.20(11) |
| C1   | C6   | C5   | 119.46(12) | O2   | B3   | O4   | 111.34(11) |
| N11  | C7   | C1   | 126.33(11) |      |      |      |            |

**Table S8.** Bond Angles for **O**.

| Atom | Atom | Atom | Angle/°    | Atom | Atom | Atom | Angle/°    |
|------|------|------|------------|------|------|------|------------|
| C00K | S1   | C00H | 91.2(2)    | C10  | C00H | S1   | 111.16(12) |
| B1   | O004 | C008 | 120.29(7)  | N007 | C00H | S1   | 120.43(7)  |
| B1   | O005 | C00B | 120.45(8)  | N007 | C00H | C10  | 128.40(13) |
| C00I | C10  | C00H | 113.0(3)   | S1a  | C00H | S1   | 120.14(11) |
| C00E | N007 | C009 | 108.43(8)  | S1a  | C00H | C10  | 8.98(18)   |
| C00H | N007 | C009 | 128.07(7)  | S1a  | C00H | N007 | 119.43(11) |
| C00H | N007 | C00E | 123.04(8)  | C10a | C00H | S1   | 4.9(5)     |
| C009 | C008 | O004 | 116.83(8)  | C10a | C00H | C10  | 106.3(5)   |
| C00D | C008 | O004 | 121.36(8)  | C10a | C00H | N007 | 125.3(5)   |
| C00D | C008 | C009 | 121.79(8)  | C10a | C00H | S1a  | 115.3(5)   |
| C008 | C009 | N007 | 124.19(8)  | C00K | C00I | C10  | 111.3(5)   |
| C00F | C009 | N007 | 107.43(8)  | C00M | C00J | C00L | 107.0(6)   |
| C00F | C009 | C008 | 128.27(8)  | C00I | C00K | S1   | 113.2(4)   |
| C00M | N8   | C00C | 107.8(3)   | C00J | C00L | C00C | 107.0(5)   |
| C00O | N8   | C00C | 130.47(18) | C00J | C00M | N8   | 109.1(5)   |
| C00O | N8   | C00M | 121.7(3)   | F003 | B1   | F002 | 111.52(8)  |
| C00C | C00B | O005 | 117.65(8)  | O004 | B1   | F002 | 109.17(8)  |
| C00D | C00B | O005 | 120.61(8)  | O004 | B1   | F003 | 108.49(8)  |
| C00D | C00B | C00C | 121.70(9)  | O005 | B1   | F002 | 108.92(8)  |
| C00B | C00C | N8   | 124.57(12) | O005 | B1   | F003 | 108.17(8)  |
| C00L | C00C | N8   | 109.0(3)   | O005 | B1   | O004 | 110.57(8)  |
| C00L | C00C | C00B | 126.4(3)   | C00P | C00O | N8   | 113.23(18) |
| N8a  | C00C | N8   | 20.52(14)  | C2   | S1a  | C00H | 88.6(8)    |
| N8a  | C00C | C00B | 125.8(2)   | C1   | C10a | C00H | 113.4(11)  |
| N8a  | C00C | C00L | 104.9(3)   | C2   | C1   | C10a | 104.9(19)  |
| C4   | C00C | N8   | 103.5(4)   | C1   | C2   | S1a  | 117.6(19)  |
| C4   | C00C | C00B | 129.5(4)   | C00n | N8a  | C00C | 109.2(5)   |
| C4   | C00C | C00L | 14.1(5)    | C5   | N8a  | C00C | 128.7(3)   |
| C4   | C00C | N8a  | 104.5(5)   | C5   | N8a  | C00n | 122.1(5)   |
| C00B | C00D | C008 | 119.06(9)  | C00n | C3   | C4   | 106.1(12)  |



|      |      |      |           |      |      |      |           |
|------|------|------|-----------|------|------|------|-----------|
| C00G | C00E | N007 | 109.28(9) | C3   | C4   | C00C | 109.3(8)  |
| C00G | C00F | C009 | 107.78(9) | C3   | C00n | N8a  | 110.6(10) |
| C00F | C00G | C00E | 107.08(9) | C00q | C5   | N8a  | 112.4(4)  |

---

## 6. Theoretical calculations

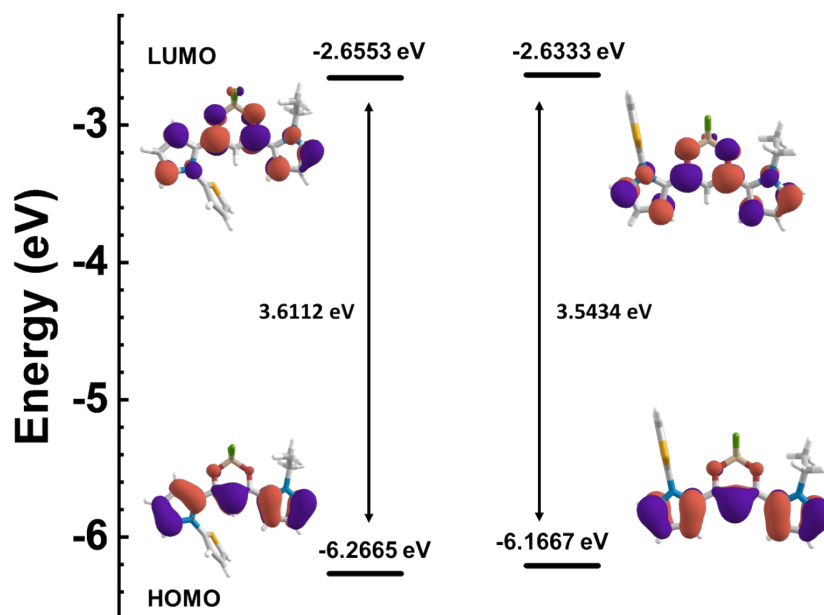

**Figure S4.** Frontier molecular orbitals (HOMO and LUMO) of the monomers selected in **G** (left) and **O** (right) respectively.

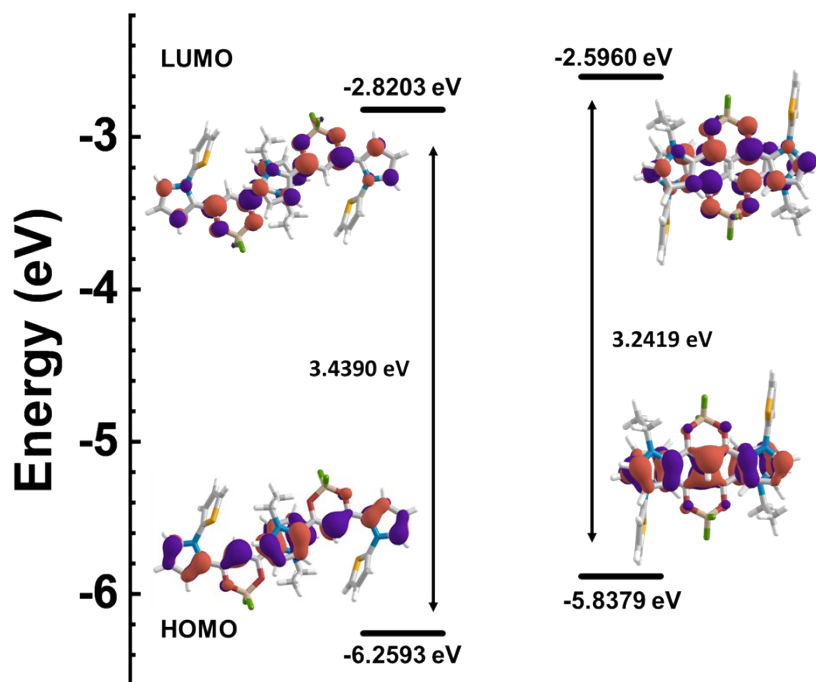

**Figure S5.** Frontier molecular orbitals (HOMO and LUMO) of the stacking dimers selected in **G** (left) and **O** (right) respectively.

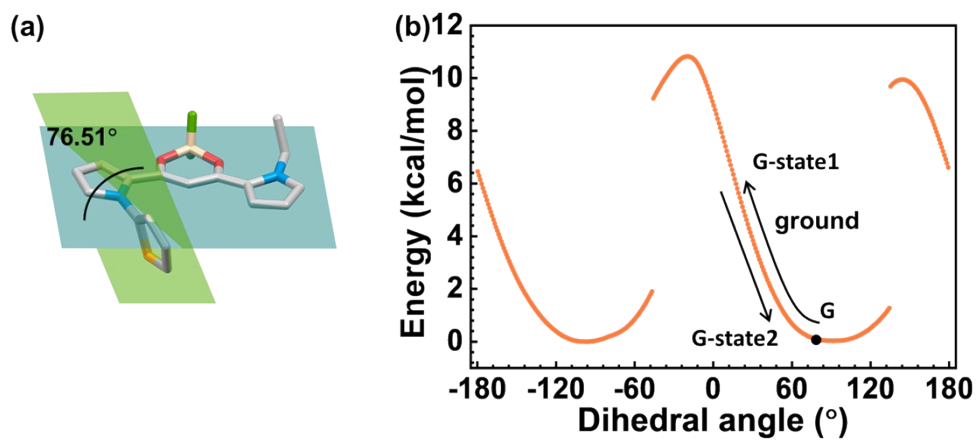

**Figure S6.** (a) Dihedral angle between the thiophene ring and conjugated body of SNN in G. (b) Potential energy landscape along the rotation of the thiophene ring of SNN.

## 7. The analysis of crystal structures

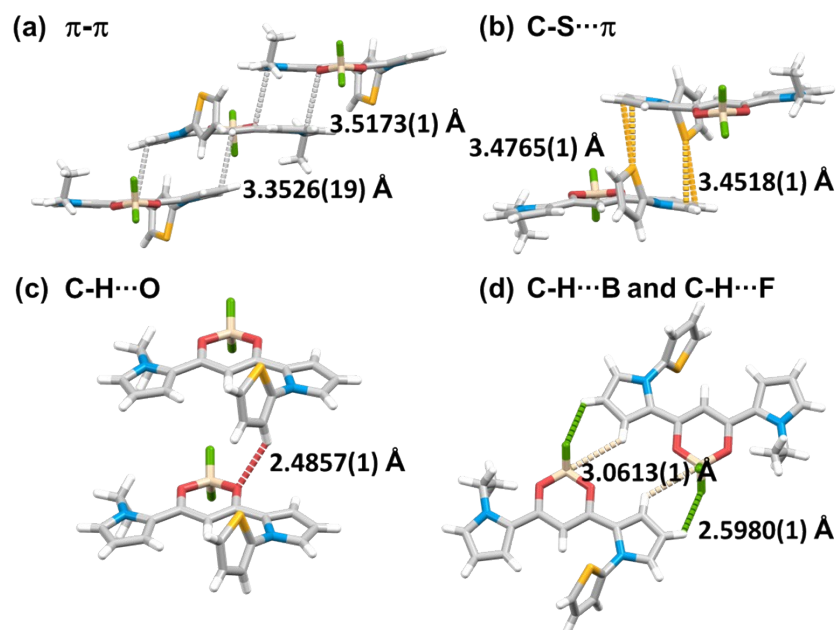

**Figure S7.** The intermolecular interactions in **G**. (a)  $\pi$ - $\pi$  interactions, (b) C-S $\cdots$  $\pi$  chalcogen bonds, (c) C-H $\cdots$ O hydrogen bonds and (d) C-H $\cdots$ B and C-H $\cdots$ F hydrogen bonds.

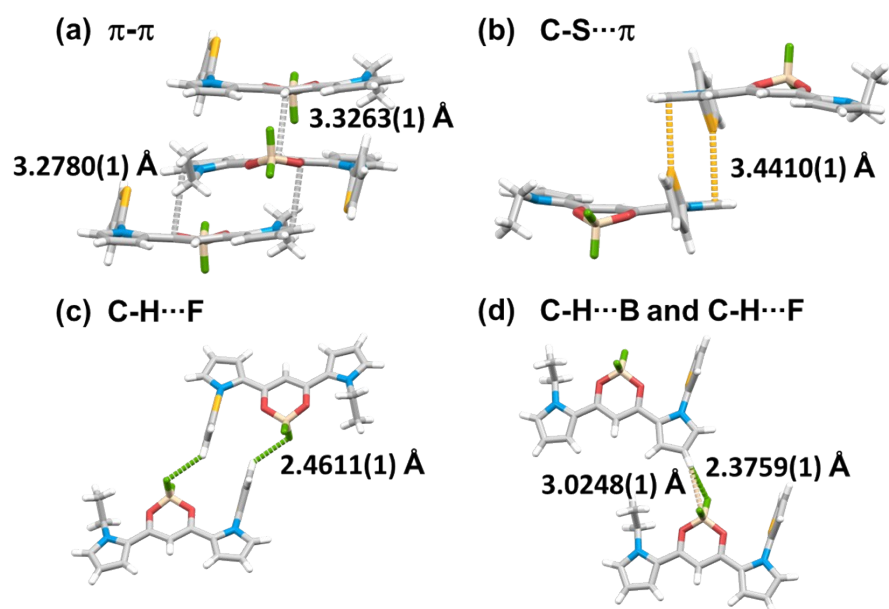

**Figure S8.** The intermolecular interactions in **O**. (a)  $\pi$ - $\pi$  interactions, (b) C-S $\cdots$  $\pi$  chalcogen bonds, (c) C-H $\cdots$ F hydrogen bonds and (d) C-H $\cdots$ B and another C-H $\cdots$ F hydrogen bonds.

**Table S9.** The torsion angles between different domains of SNN.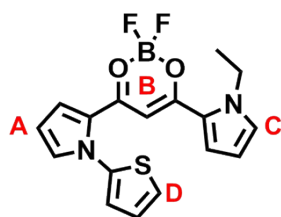

| Torsion angle | A & B     | B & C      | D & A      |
|---------------|-----------|------------|------------|
| <b>G</b>      | 9.2(2)°   | 9.2(2)°    | 66.40(16)° |
| <b>O</b>      | 5.902(3)° | 11.716(3)° | 74.495(4)° |

**Table S10.** Photophysical data of SNN in solution and solid.

| Samples                         | $\lambda_{\text{abs}}$<br>(nm) | $\epsilon$<br>( $\text{cm}^{-1}\cdot\text{M}^{-1}$ ) | $\lambda_{\text{ex}}$<br>(nm) | $\lambda_{\text{em}}$<br>(nm) | $\tau_{\text{em}}$<br>(ns) | $\Phi$<br>(%) |
|---------------------------------|--------------------------------|------------------------------------------------------|-------------------------------|-------------------------------|----------------------------|---------------|
| <b>Toluene solution</b>         | 433                            | 61347                                                | 435°                          | 453                           | 1.6                        | 36            |
| <b><i>n</i>-Hexane solution</b> | 422                            | 51352                                                | 422                           | 439                           | —                          | —             |
| <b>Tetrahydrofuran solution</b> | 433                            | 61462                                                | 433                           | 452                           | —                          | —             |
| <b>Dichloromethane solution</b> | 436                            | 73390                                                | 436                           | 460                           | —                          | —             |
| <b>Methanol solution</b>        | 434                            | 54531                                                | 434                           | 458                           | —                          | —             |
| <b>1 wt% PMMA film</b>          | —                              | —                                                    | 310                           | 480                           | 1.9                        | —             |
| <b>50 wt% PMMA film</b>         | —                              | —                                                    | 310                           | 577                           | 13.8                       | —             |
| <b>G</b>                        | —                              | —                                                    | 365                           | 514                           | 0.8                        | 21            |
| <b>O</b>                        | —                              | —                                                    | 365                           | 592                           | 23                         | 16            |



## 8. Emission spectra in solid

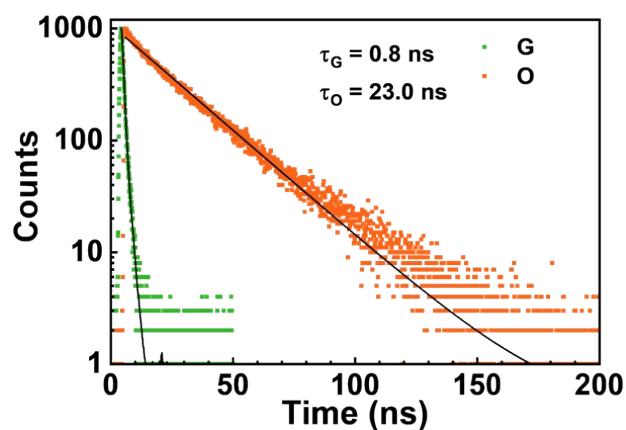

Figure S9. The fluorescence decay profiles G and O.

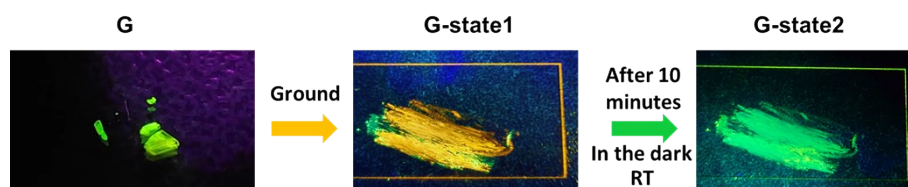

Figure S10. The images of G, G-state1 and G-state2. The transformation from G-state1 to G-state2 occurs in the dark and at room temperature.

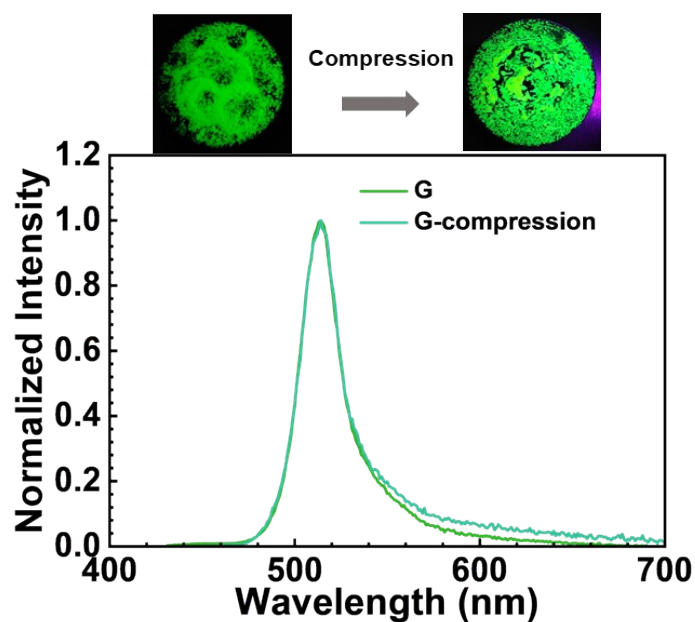

Figure S11. (a) The normalized fluorescence spectra of G and compression powder.

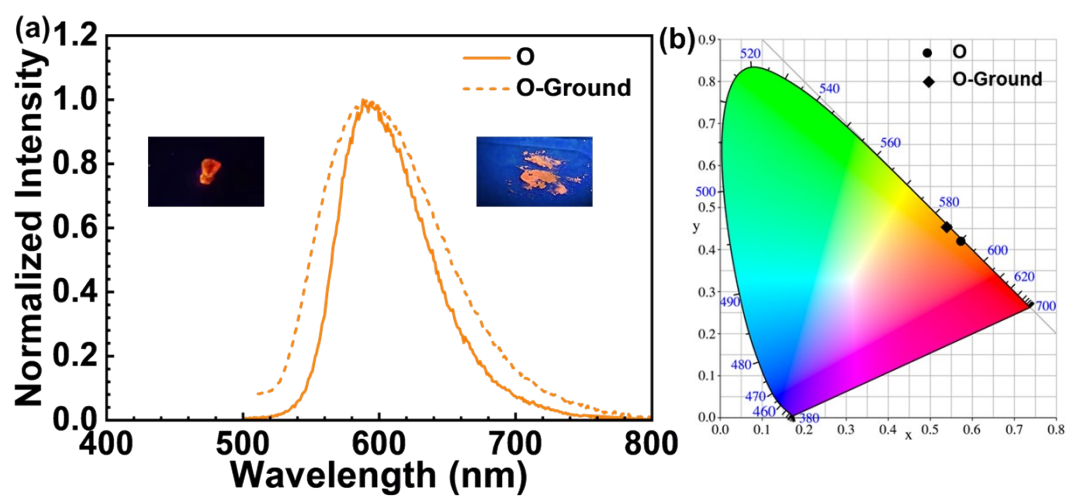

**Figure S12.** (a) The normalized fluorescence spectra and (b) CIE coordinate diagram of O crystals and ground powder.



## 8. Powder X-ray diffraction

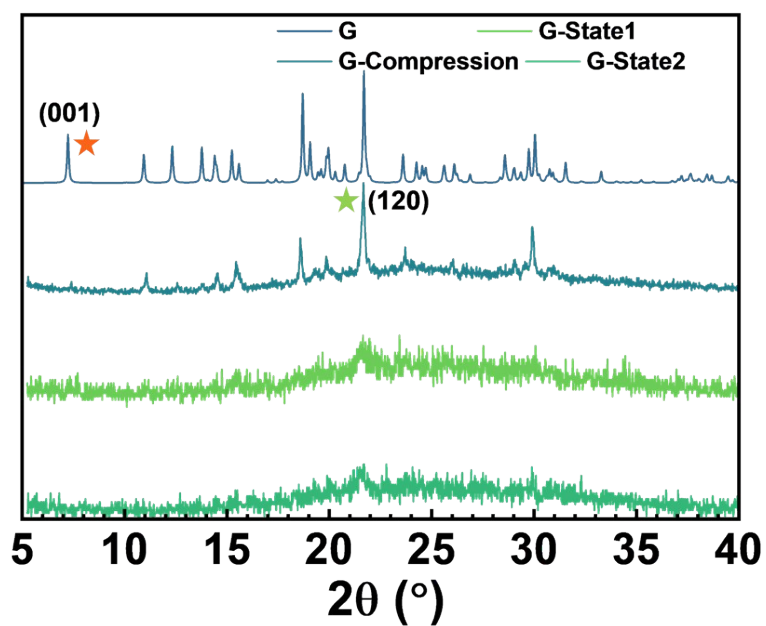

Figure S13. PXRD profiles of SNN in different state.

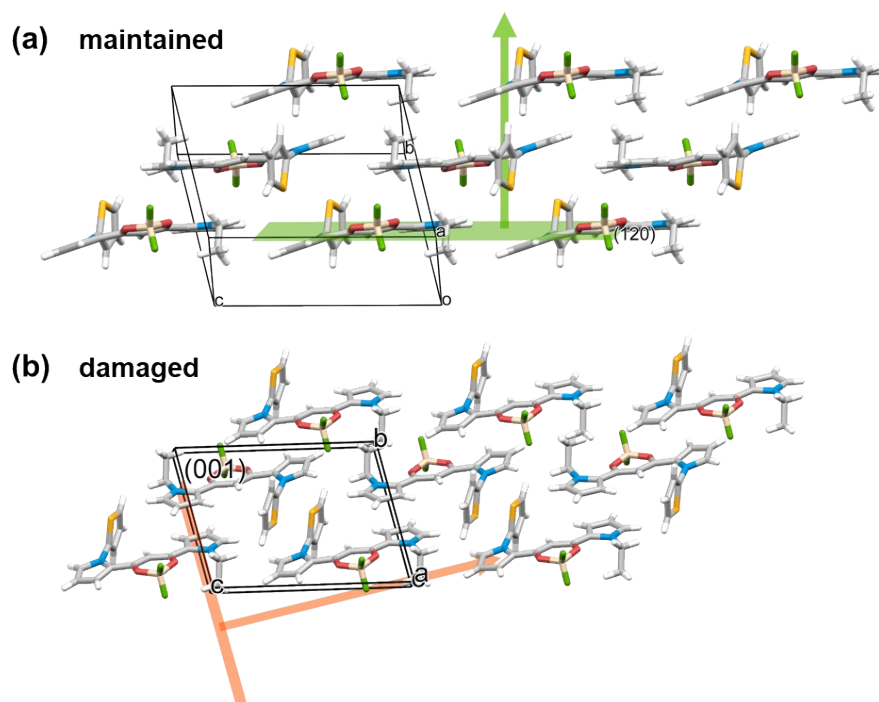

Figure S14. The structures of G along the directions perpendicular to the (a) (120) and (b) (001) plane. The (120) and (001) planes are drawn as a green plane and an orange plane. The arrows denote their vertical directions.

## 10. NMR spectra

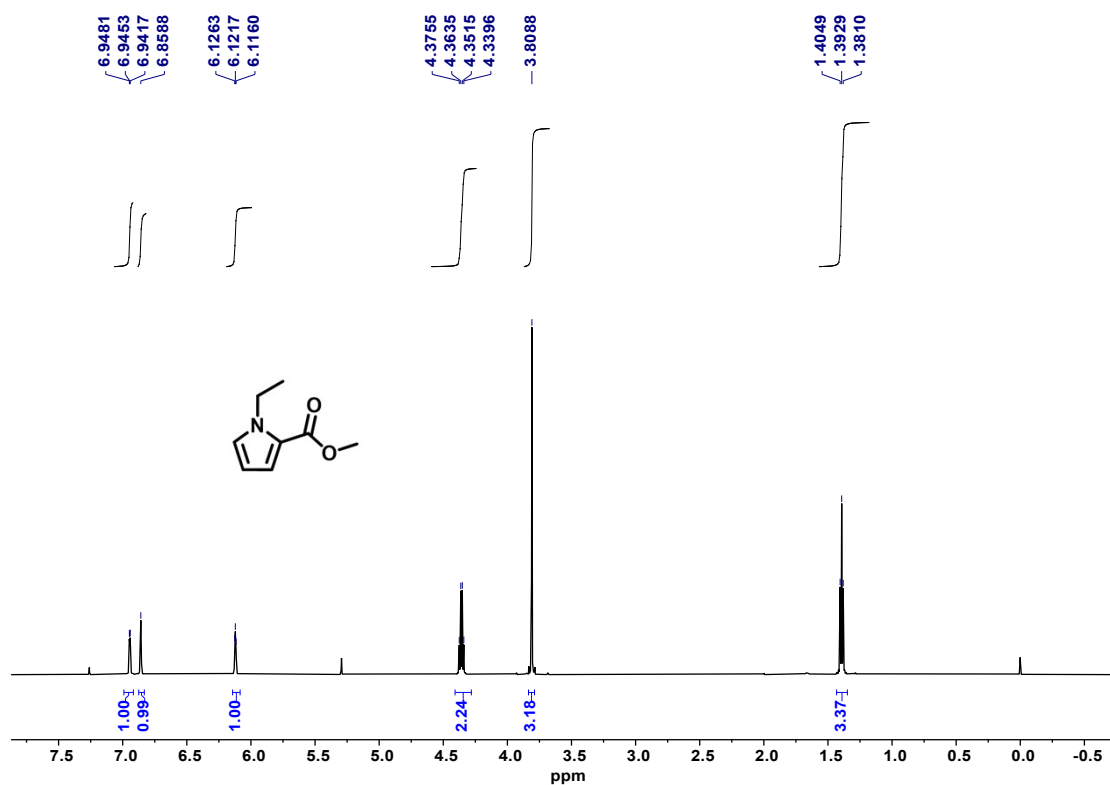

**Figure S15.** The <sup>1</sup>H NMR spectrum of compound **5** in CDCl<sub>3</sub> (600 MHz, 298 K).

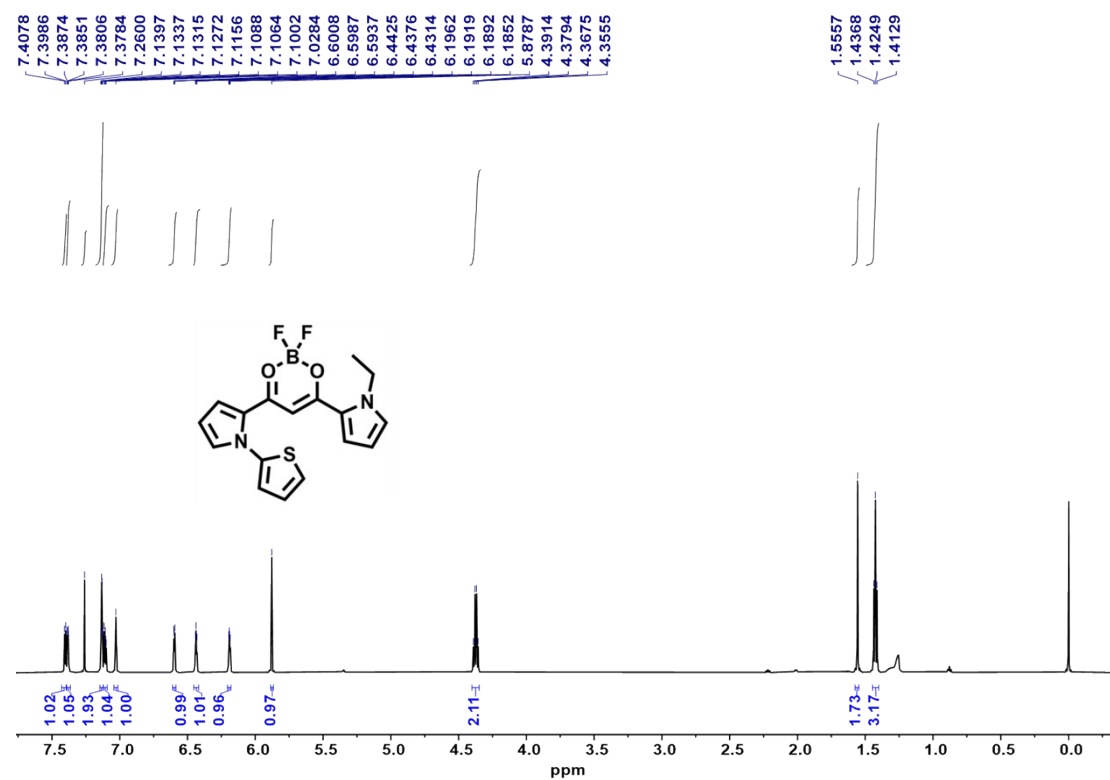

**Figure S16.** The <sup>1</sup>H NMR spectrum of SNN in CDCl<sub>3</sub> (600 MHz, 298 K).

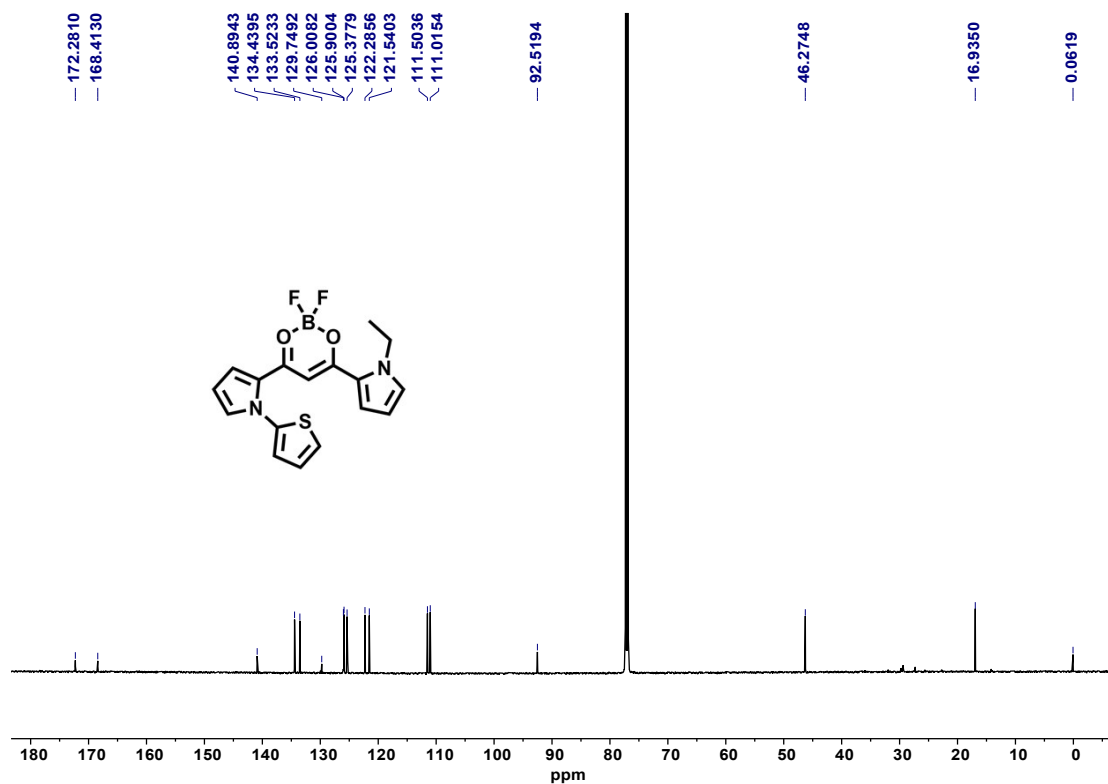

Figure S17. The <sup>13</sup>C NMR spectrum of SNN in CDCl<sub>3</sub> (600 MHz, 298 K).

## 11. Mass spectra

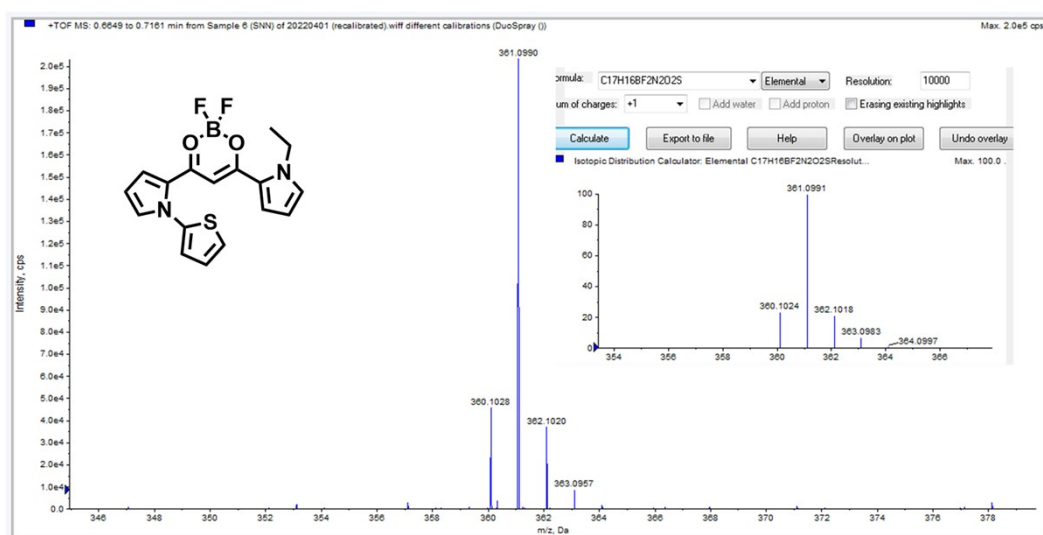

Figure S18. Calculated and experimental ESI-MS spectra of SNN.

## 14. References

1. F. Kleemiss, O. V. Dolomanov, M. Bodensteiner, N. Peyrerimhoff, L. Midgley, L. J. Bourhis, A. Genoni, L. A. Malaspina, D. Jayatilaka, J. L. Spencer, F. White, B. Grundkotter-Stock, S. Steinhauer, D. Lentz, H. Puschmann and S. Grabowsky, *Chem. Sci.*, 2021, **12**, 1675–1692.
2. M. J. Frisch, G. W. Trucks, H. B. Schlegel, G. E. Scuseria, M. A. Robb, J. R. Cheeseman, G. Scalmani, V. Barone, B. Mennucci, G. A. Petersson, H. Nakatsuji, M. Caricato, X. Li, H. P. Hratchian, A. F. Izmaylov, J. Bloino, G. Zheng, J. L. Sonnenberg, M. Hada, M. Ehara, K. Toyota, R. Fukuda, J. Hasegawa, M. Ishida, T. Nakajima, Y. Honda, O. Kitao, H. Nakai, T. Vreven, J. A. Montgomery, Jr., J. E. Peralta, F. Ogliaro, M. Bearpark, J. J. Heyd, E. Brothers, K. N. Kudin, V. N. Staroverov, R. Kobayashi, J. Normand, K. Raghavachari, A. Rendell, J. C. Burant, S. S. Iyengar, J. Tomasi, M. Cossi, N. Rega, J. M. Millam, M. Klene, J. E. Knox, J. B. Cross, V. Bakken, C. Adamo, J. Jaramillo, R. Gomperts, R. E. Stratmann, O. Yazyev, A. J. Austin, R. Cammi, C. Pomelli, J. W. Ochterski, R. L. Martin, K. Morokuma, V. G. Zakrzewski, G. A. Voth, P. Salvador, J. J. Dannenberg, S. Dapprich, A. D. Daniels, Ö. Farkas, J. B. Foresman, J. V. Ortiz, J. Cioslowski, and D. J. Fox, Gaussian 09 (Gaussian, Inc., Wallingford CT, 2009).
3. Z.-F. Liu, J. Ren, P. Li, L.-Y. Niu, Q. Liao, S. Zhang and Q.-Z. Yang, *Angew. Chem. Int. Ed.*, 2022, e202214211.
